# Supplementary material for: Intramolecular oxidative palladium-catalyzed diamination reactions of alkenyl sulfamates: an efficient synthesis of [1,2,5]thiadiazolo-fused piperazinones
Source: Royal Society of Chemistry journal article supplement (doi:10.1039/c6ra13141g), 2016-01-01

## Supplementary Information: NMR spectra of more representative compounds

# Intramolecular oxidative palladium-catalyzed diamination reactions of alkenyl sulfamates: An efficient synthesis of [1,2,5]thiadiazolo-fused piperazinones

Ugo Chiacchio,<sup>\*a</sup> Gianluigi Broggini,<sup>b</sup> Roberto Romeo,<sup>c</sup> Silvia Gazzola,<sup>b</sup> Maria A. Chiacchio,<sup>a</sup> Salvatore V. Giofrè,<sup>c</sup> Bartolo Gabriele,<sup>c</sup> Raffaella Mancuso,<sup>d</sup> Giuseppe Floresta,<sup>a</sup> Chiara Zagni<sup>a</sup>

a. Dipartimento di Scienze del Farmaco, Università di Catania, Viale A. Doria 6, 9515 Catania, Italy.

b. Dipartimento di Scienza e Alta Tecnologia, Università dell'Insubria, Via Valleggio 9, 22100 Como, Italy.

c. Dipartimento di Scienze Chimiche, Biologiche, Farmaceutiche ed Ambientali, Università di Messina, via SS. Annunziata, 98168 Messina, Italy.

d. Laboratory of Industrial and Synthetic Organic Chemistry (LISOC), Dipartimento di Chimica e Tecnologie Chimiche, Università della Calabria, Via B. Pucci, 12/C, 87036 Arcavacata di Rende (CS), Italy.

<sup>1</sup>H NMR 5a

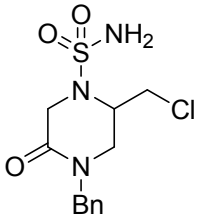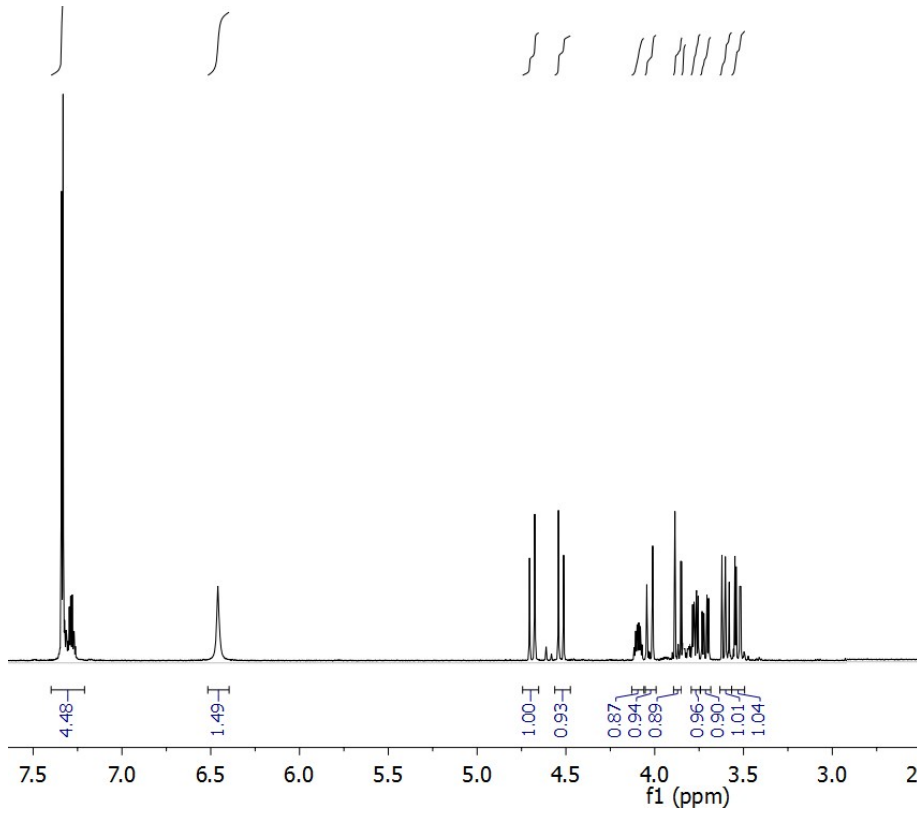

<sup>1</sup>H NMR 6a

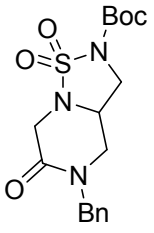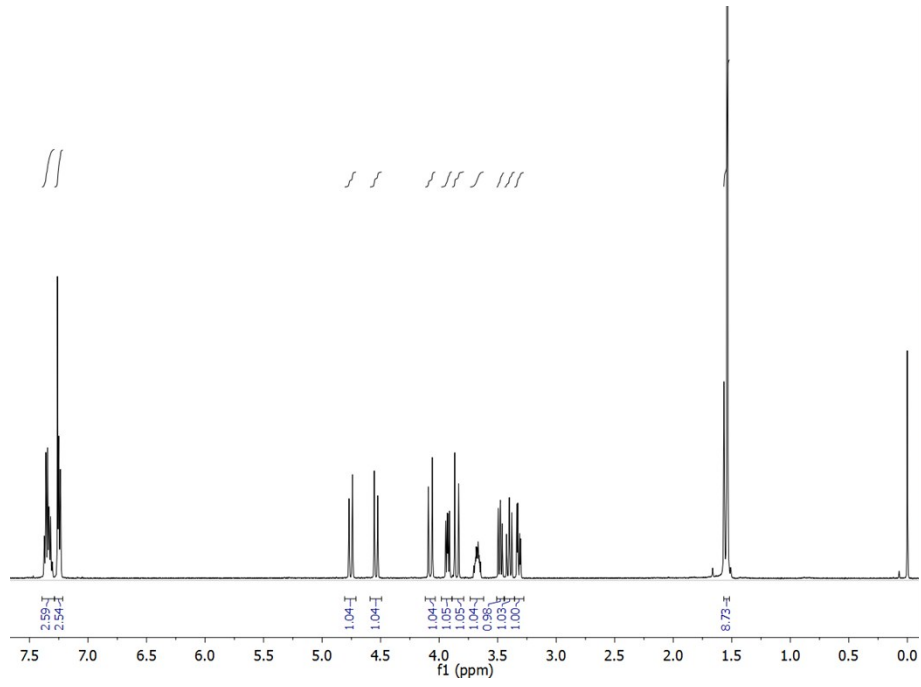

<sup>1</sup>H NMR 6b

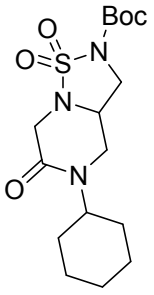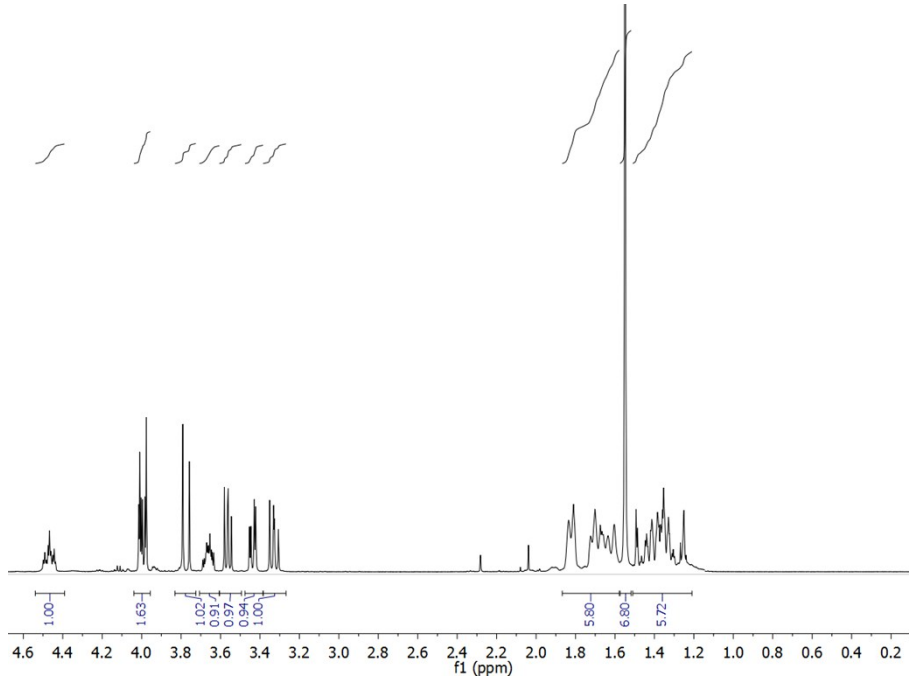

$^1\text{H}$  NMR **6c**

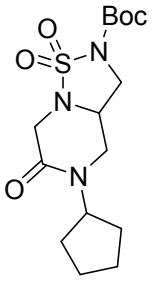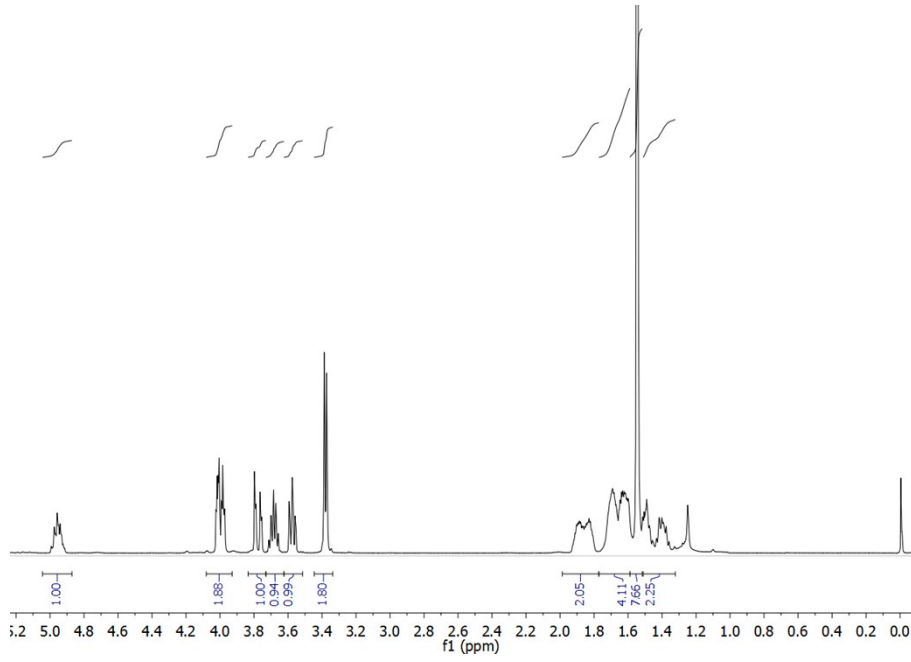

<sup>1</sup>H NMR 6d

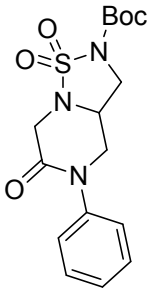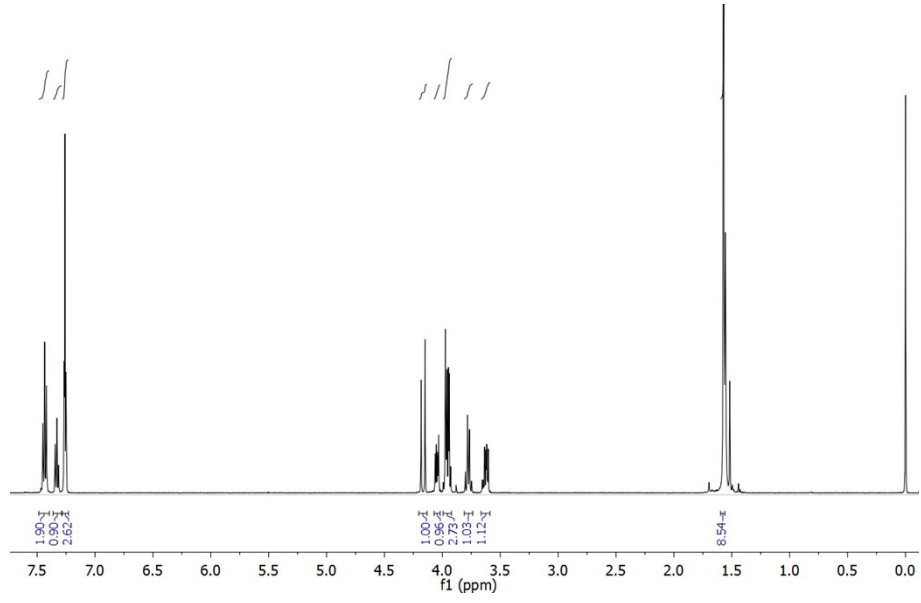

<sup>1</sup>H NMR 9a

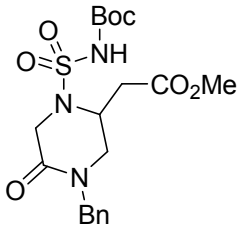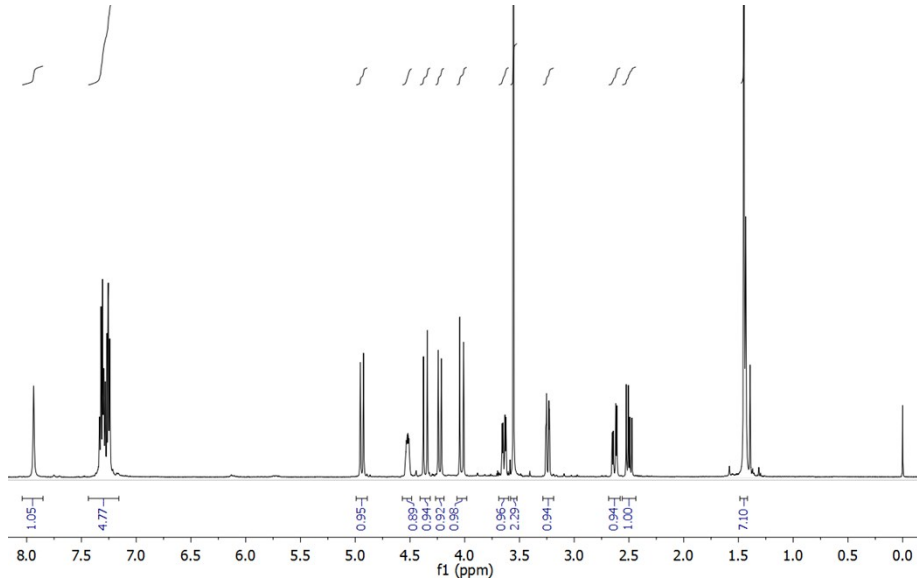

<sup>1</sup>H NMR 10a

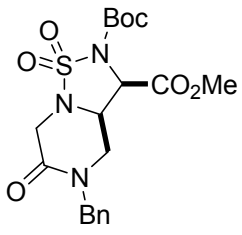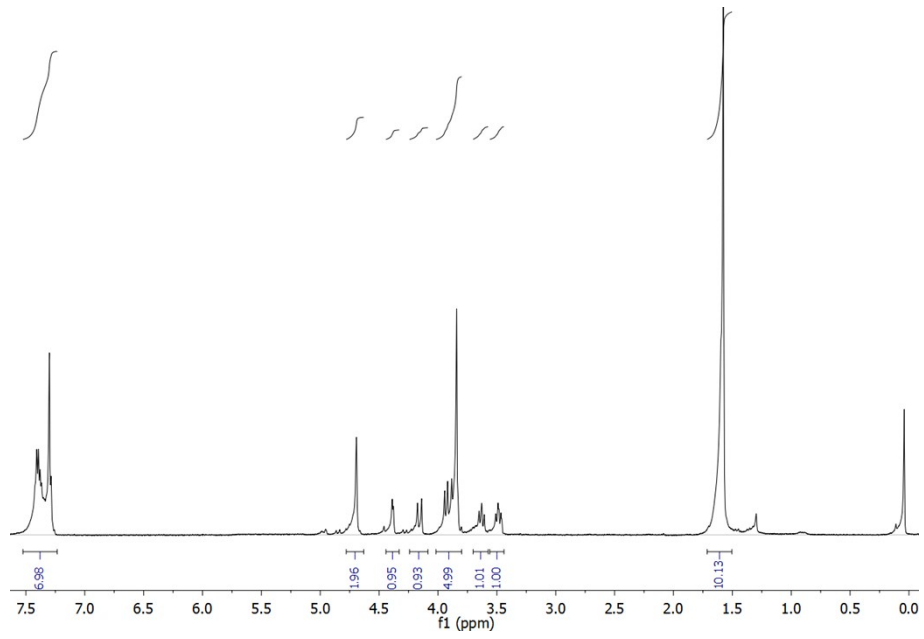



**<sup>1</sup>H NMR 10b**

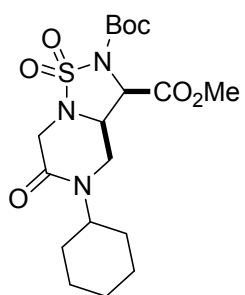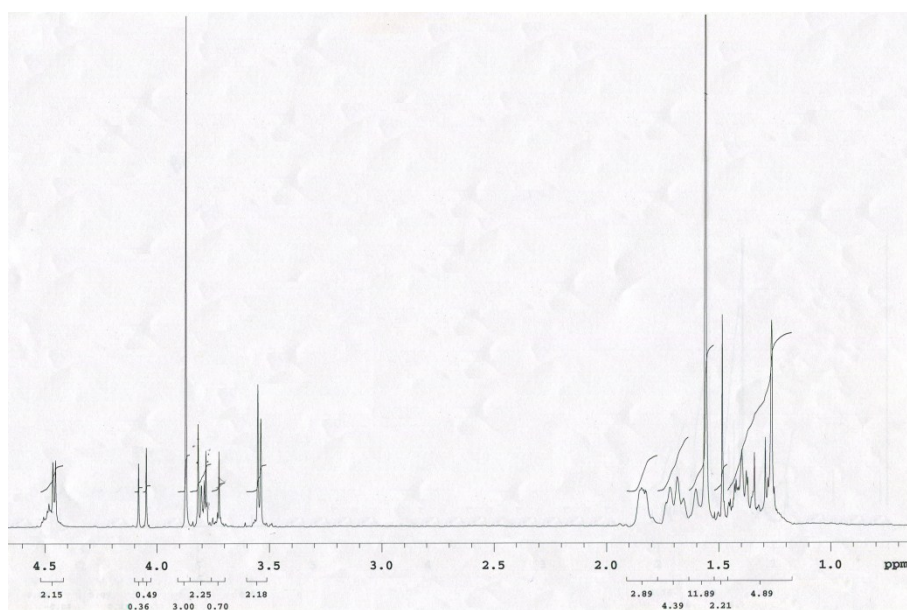

<sup>1</sup>H NMR 10c

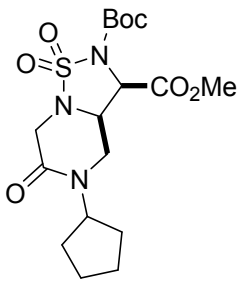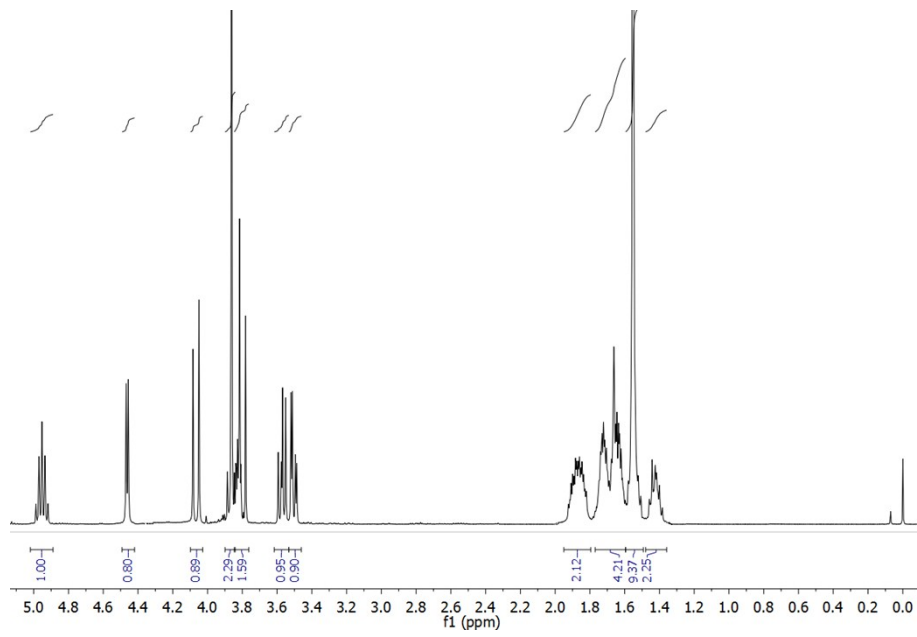

<sup>1</sup>H NMR 11a

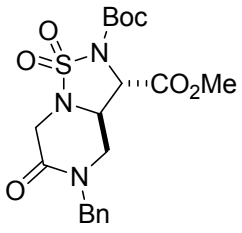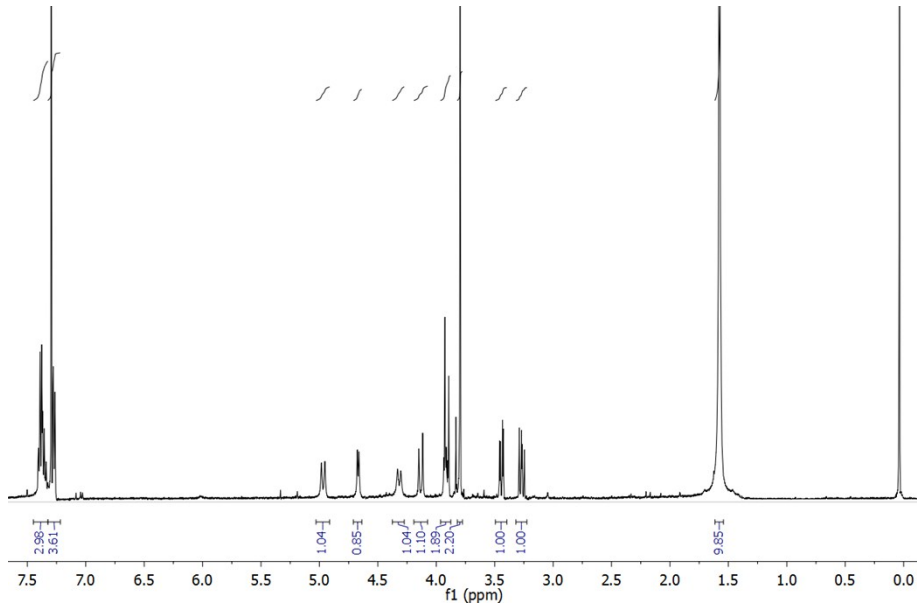

**<sup>1</sup>H NMR 11b**

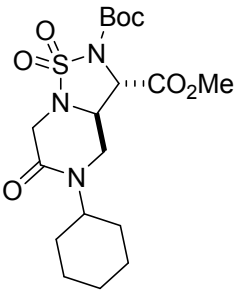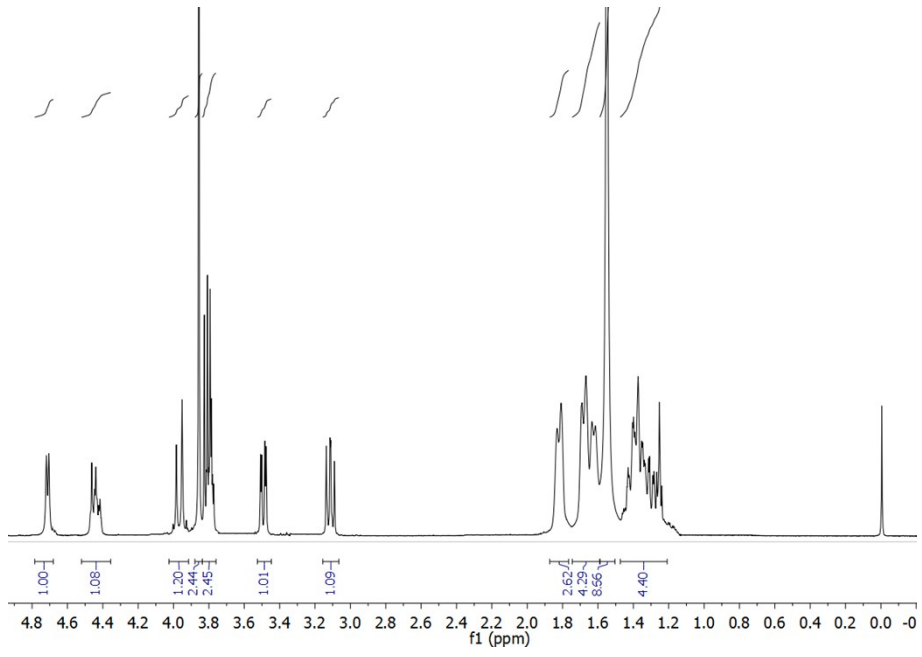

$^1\text{H}$  NMR **11c**

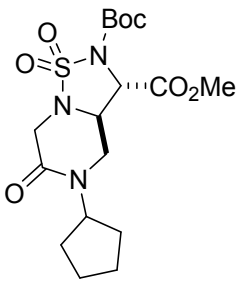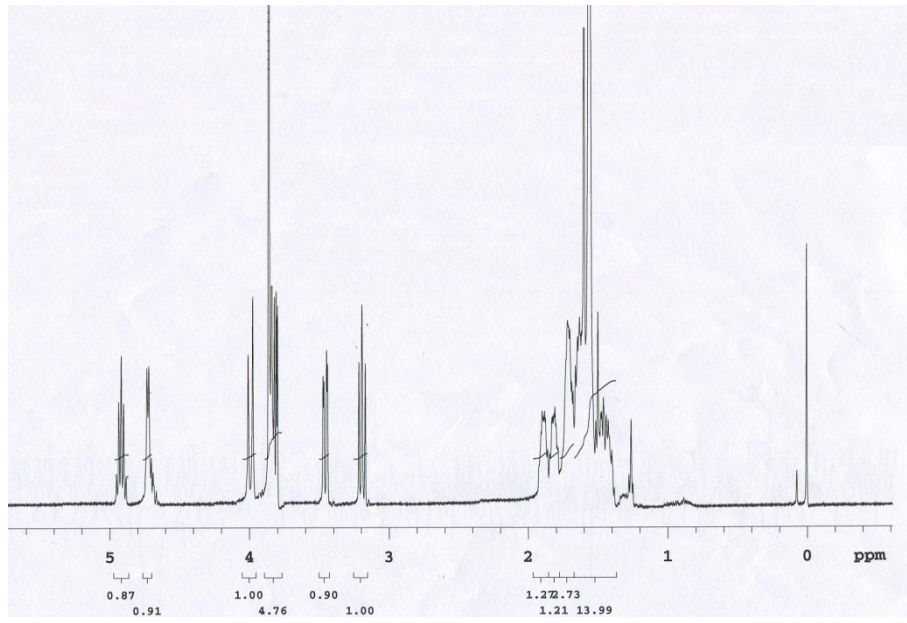

### <sup>13</sup>C NMR 5a

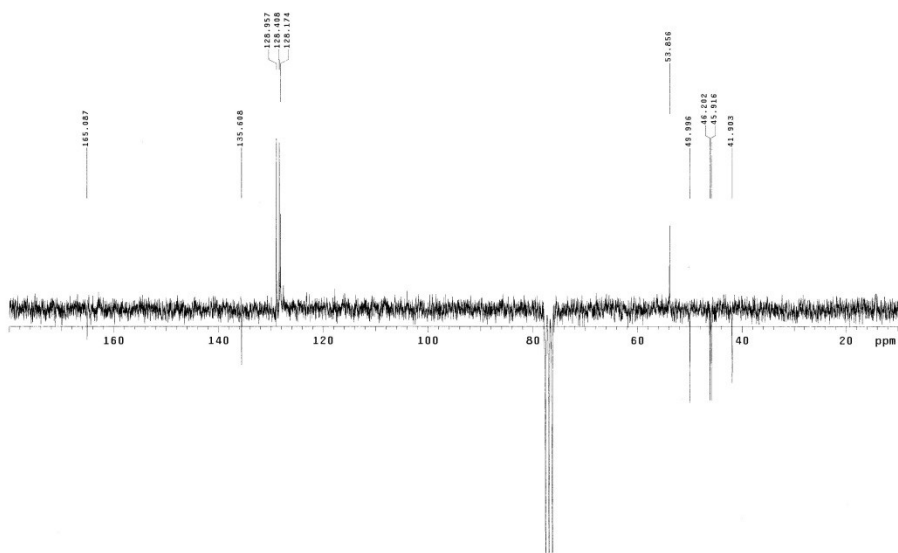

### <sup>13</sup>C NMR 6a

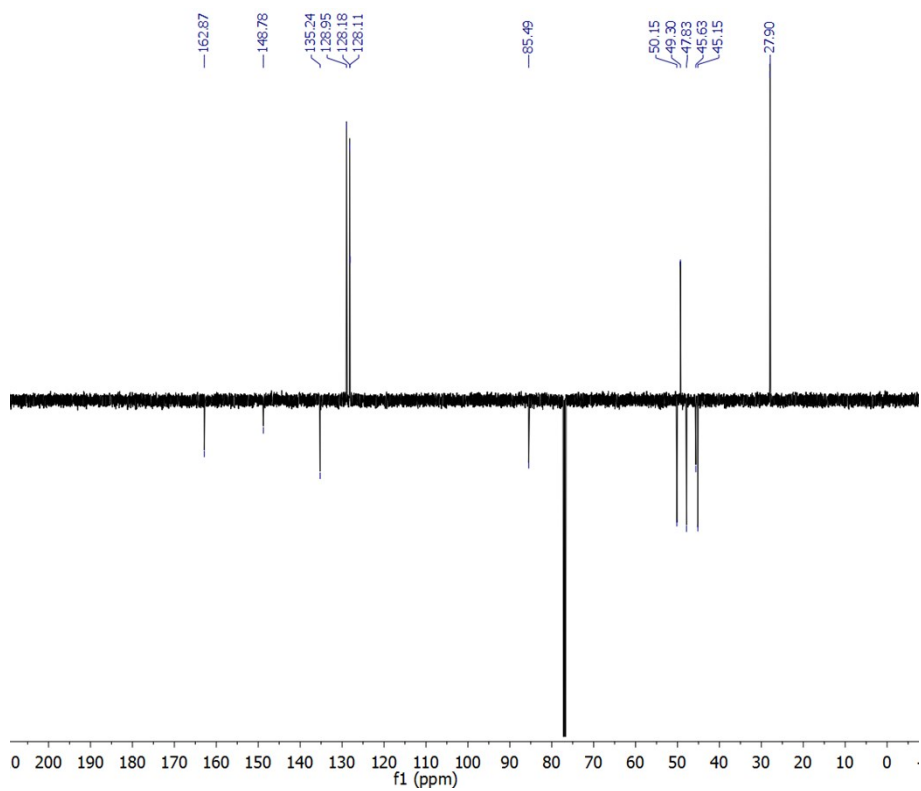

### <sup>13</sup>C NMR 6b

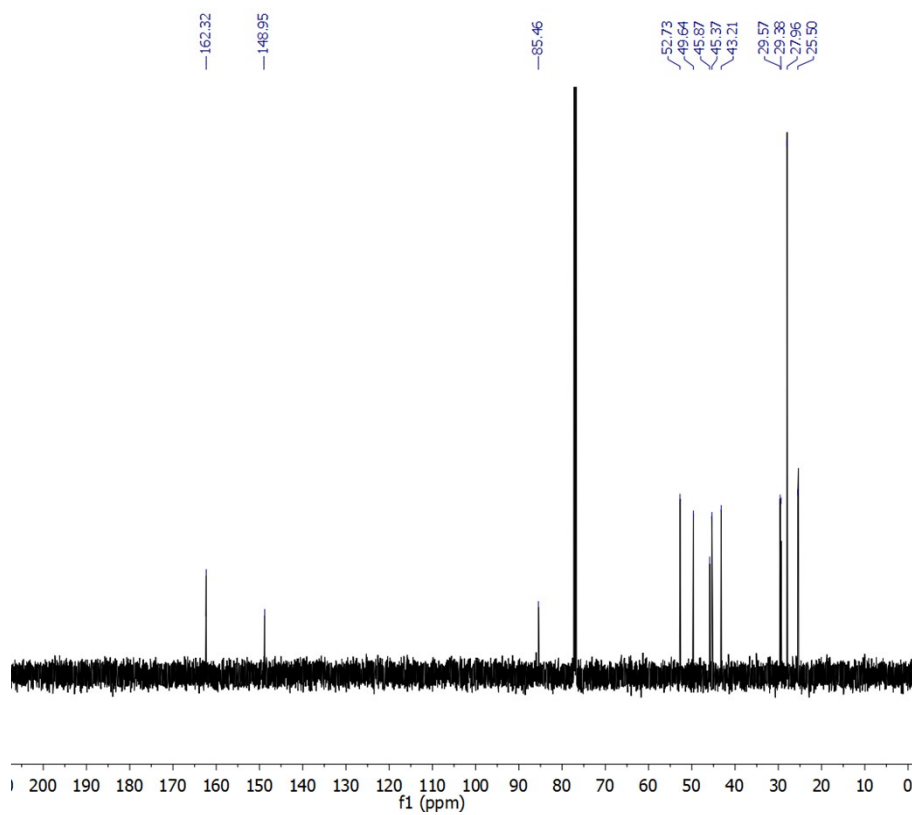

### <sup>13</sup>C NMR 6c

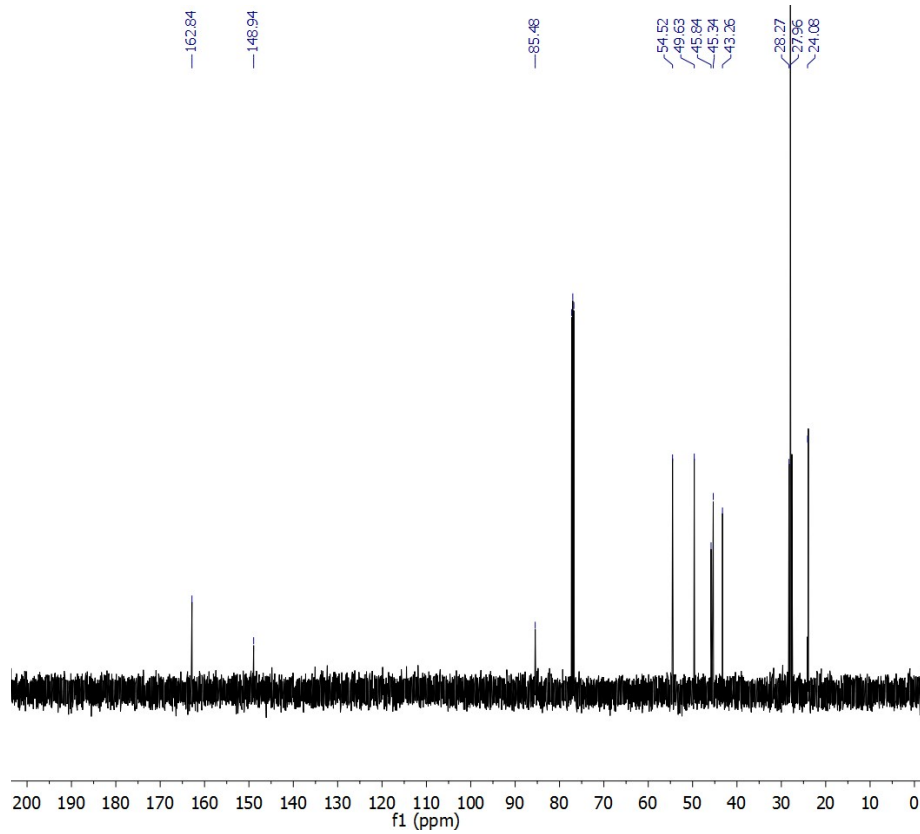

### <sup>13</sup>C NMR 6d

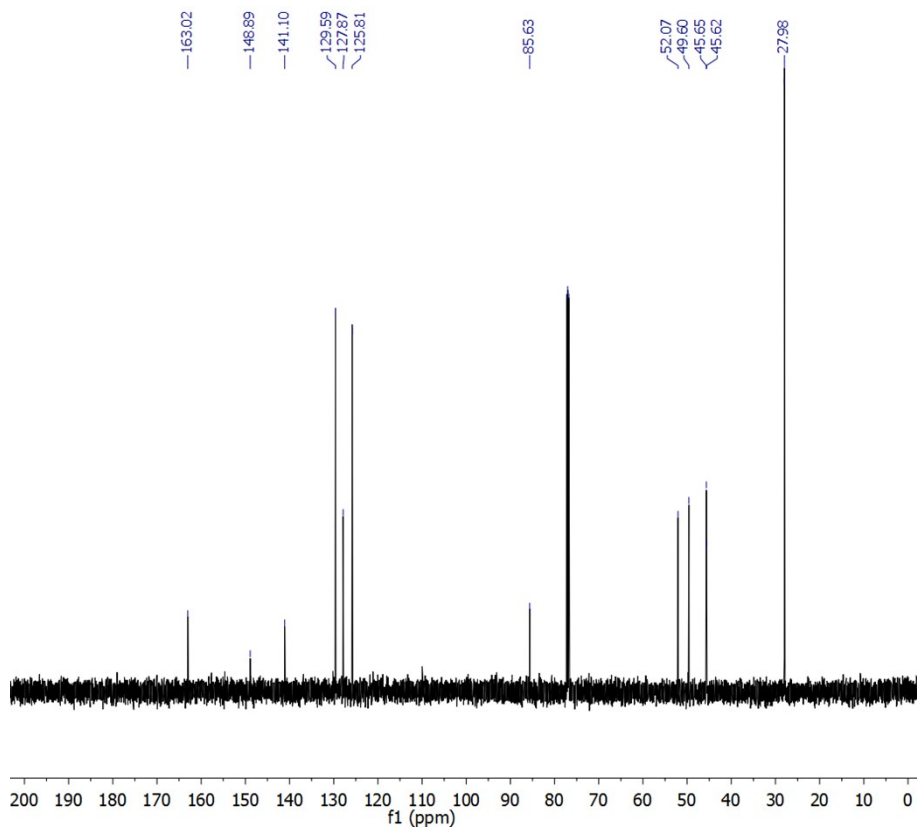

### <sup>13</sup>C NMR 9a

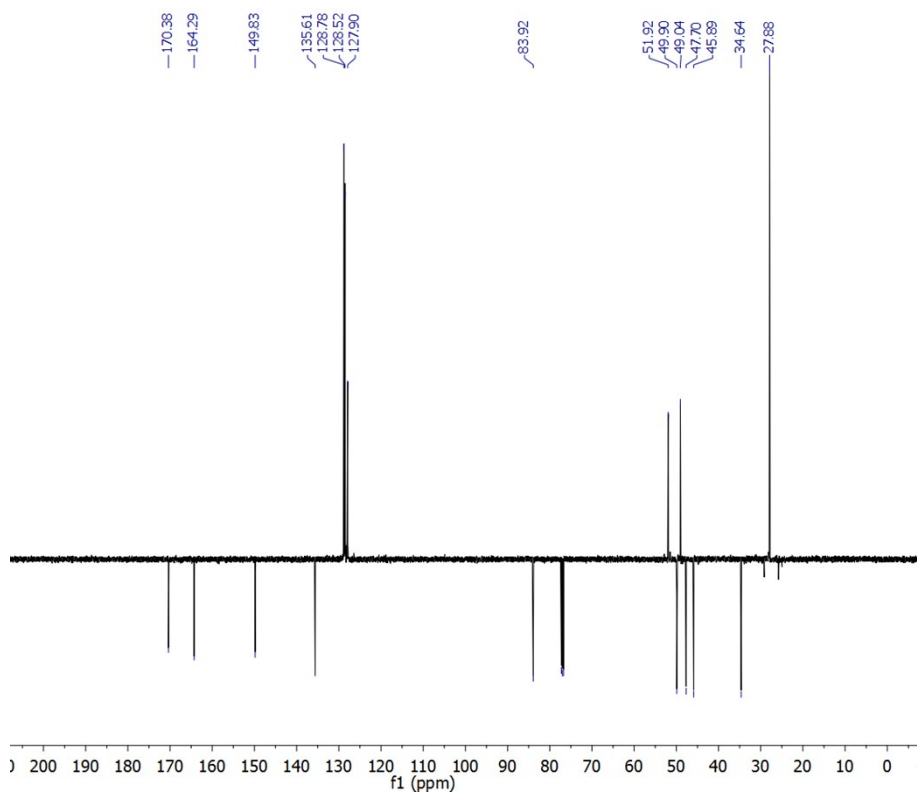



### <sup>13</sup>C NMR 10a

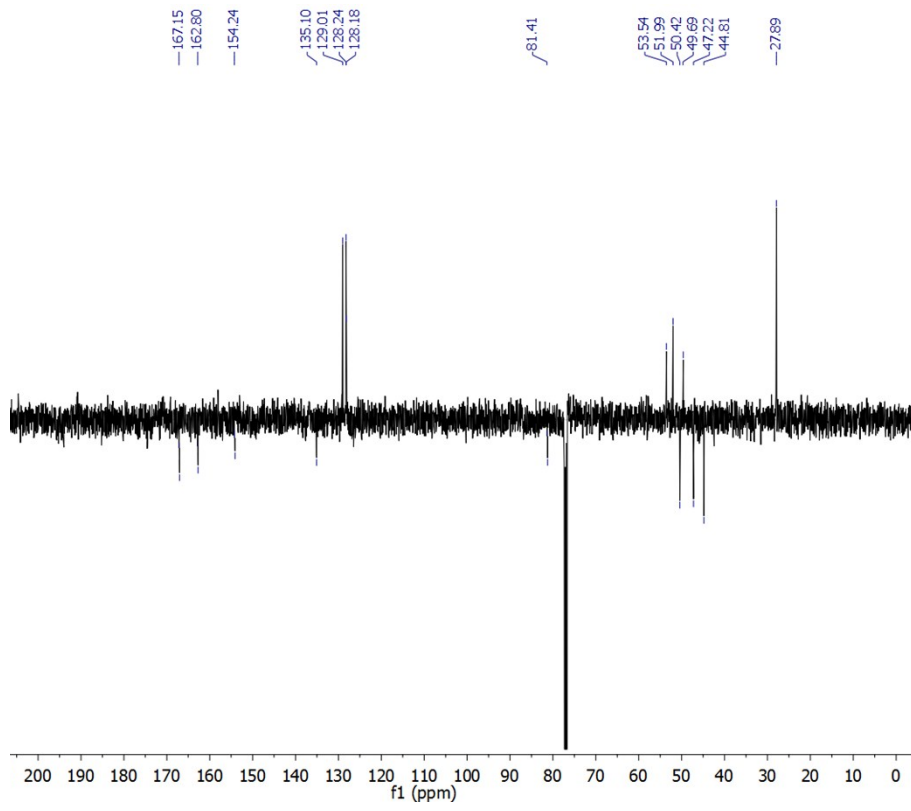

### <sup>13</sup>C NMR 10b

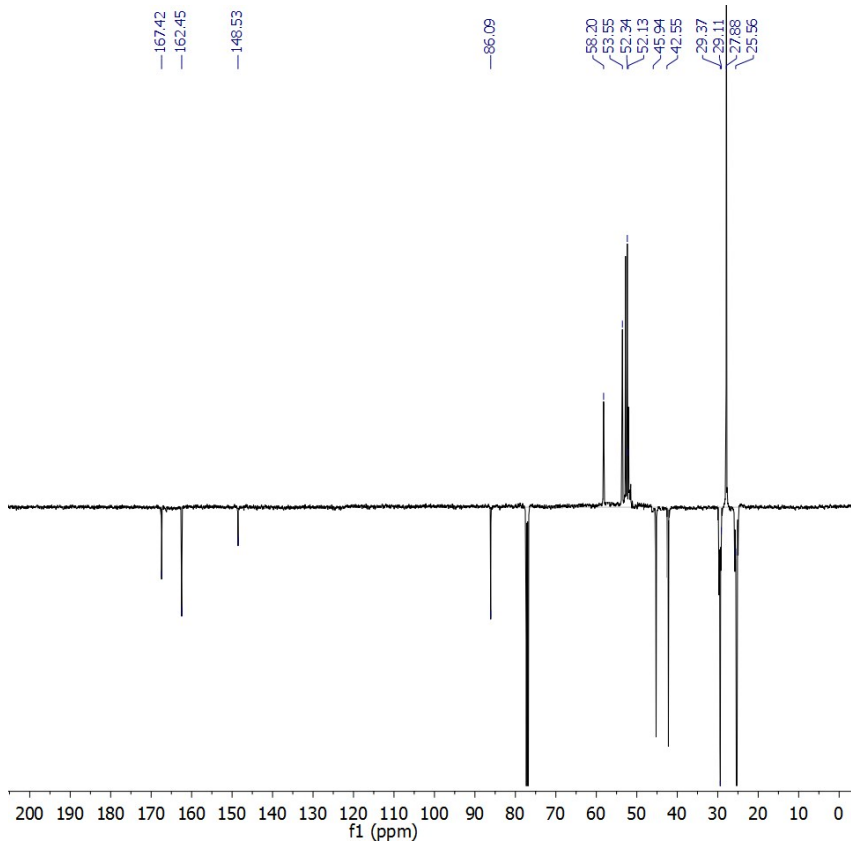

### <sup>13</sup>C NMR 10c

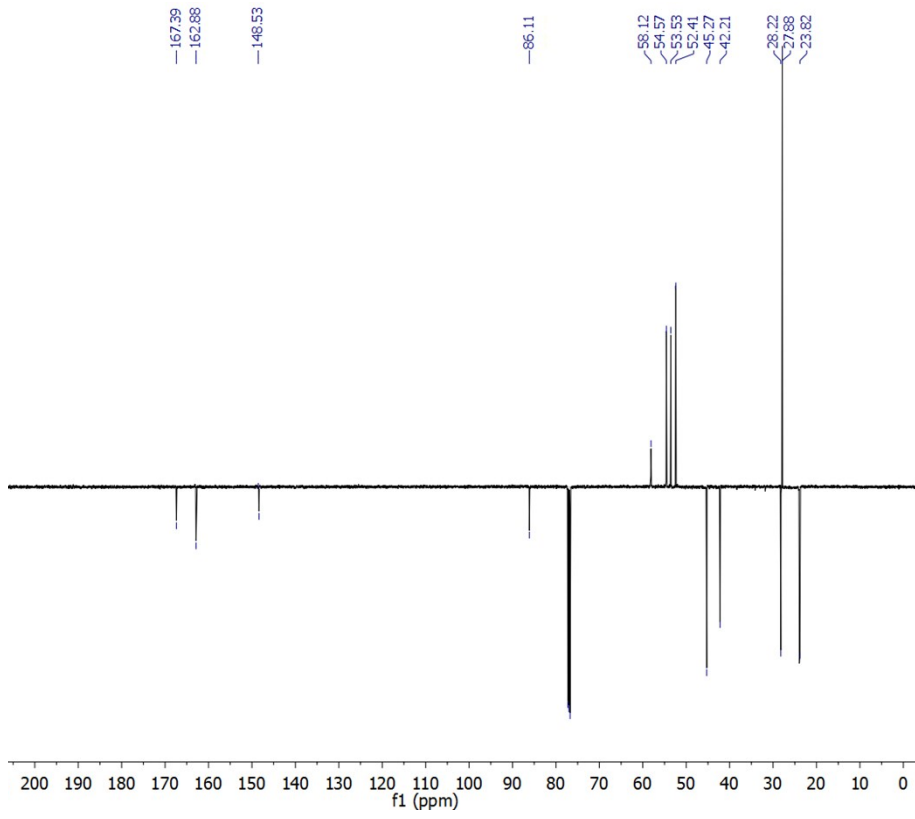

### <sup>13</sup>C NMR 11a

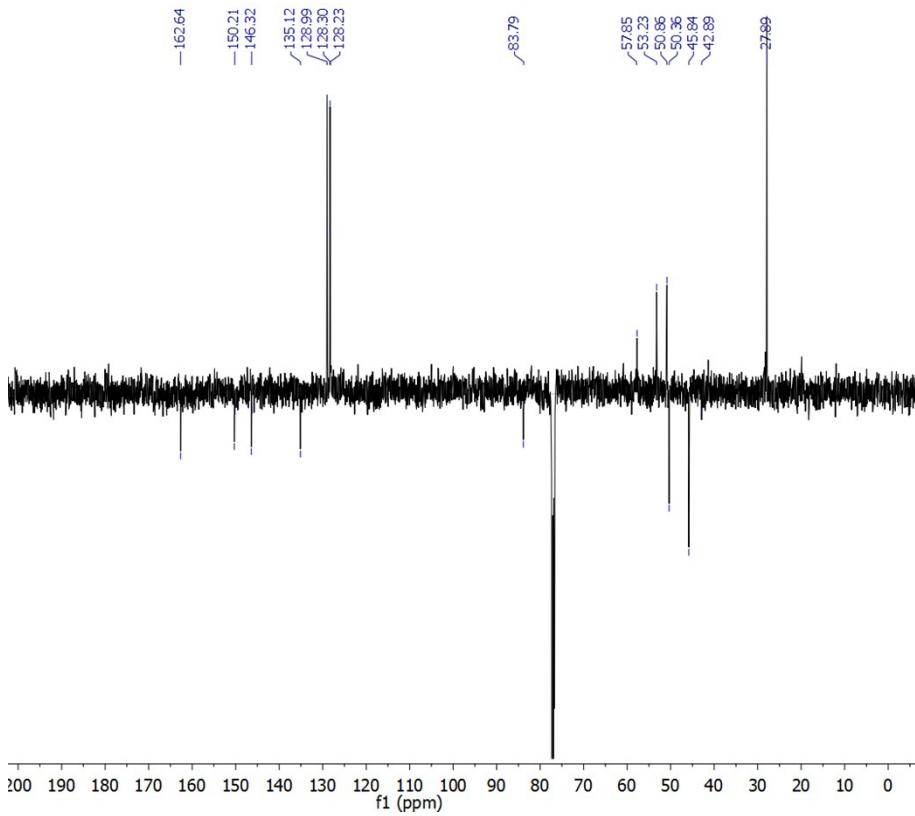

### <sup>13</sup>C NMR 11b

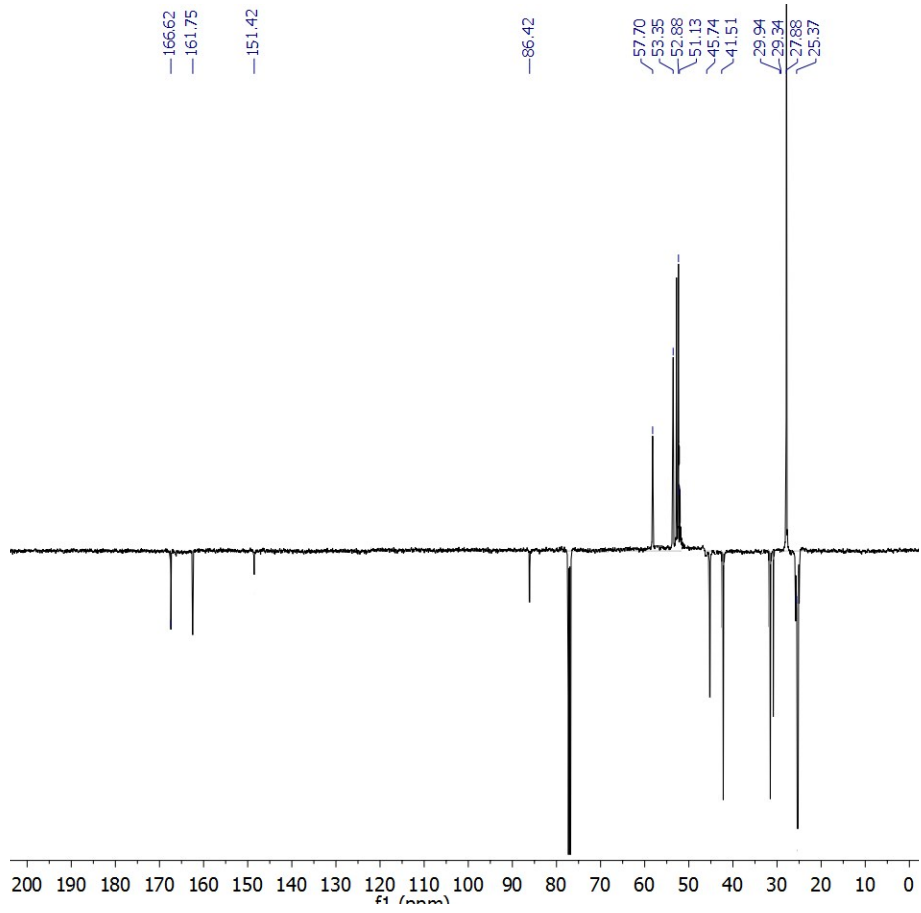

### <sup>13</sup>C NMR 11c

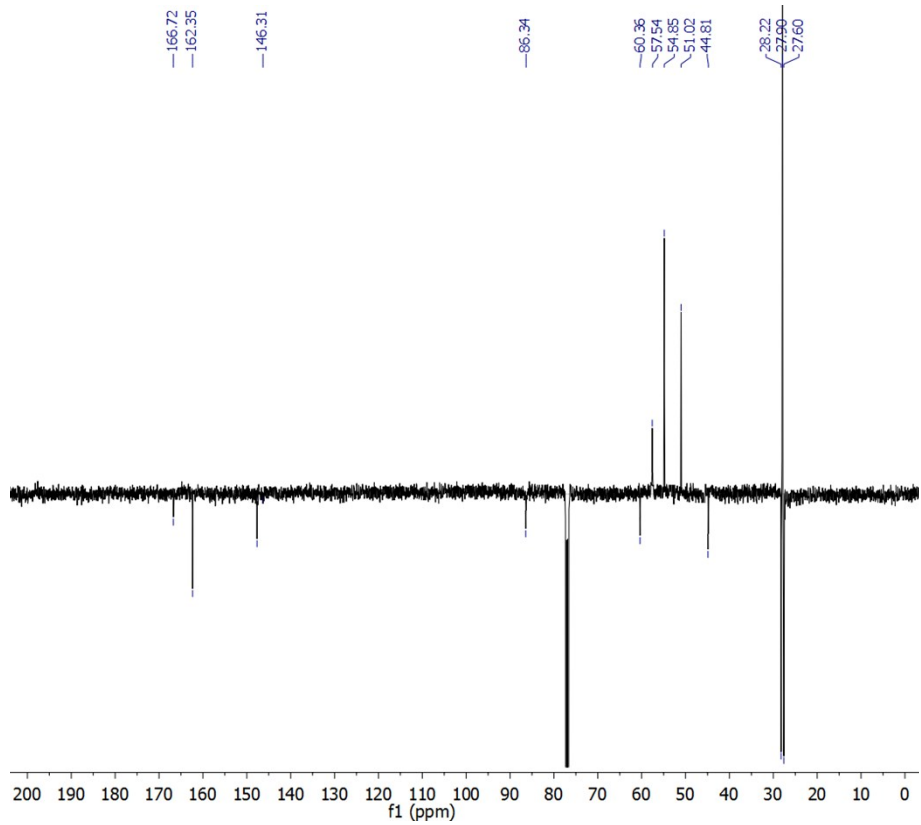

## IR spectra of more representative compounds

3a

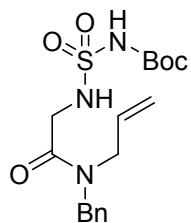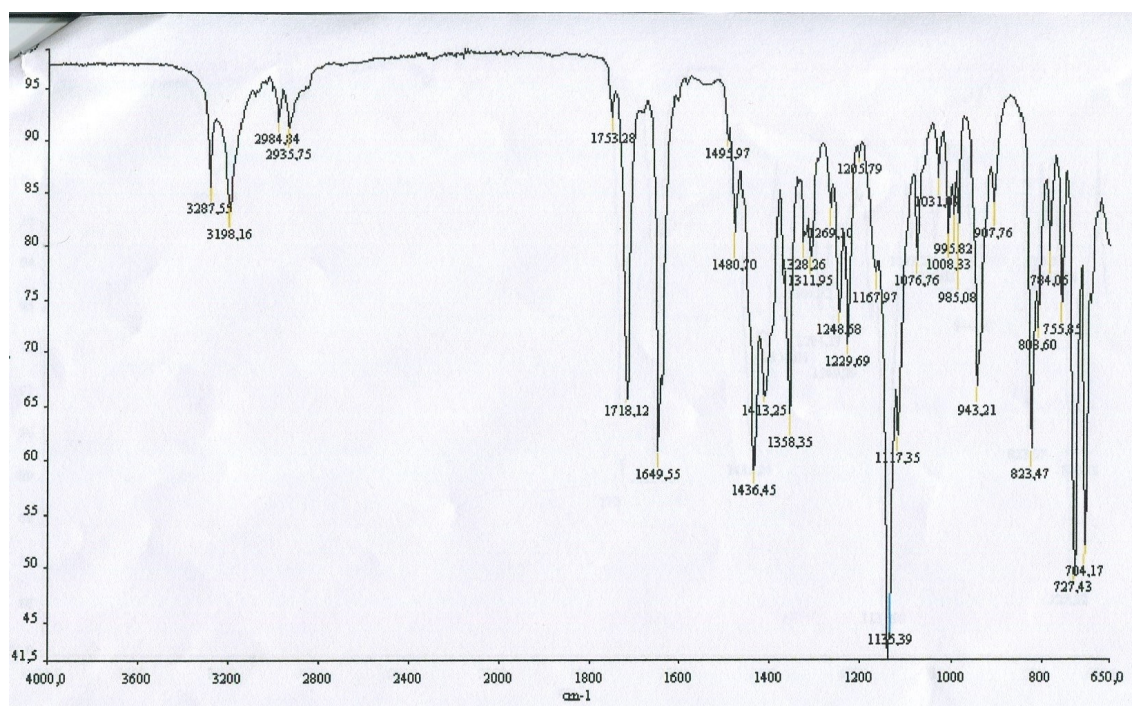

5a

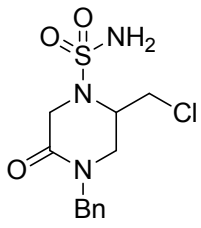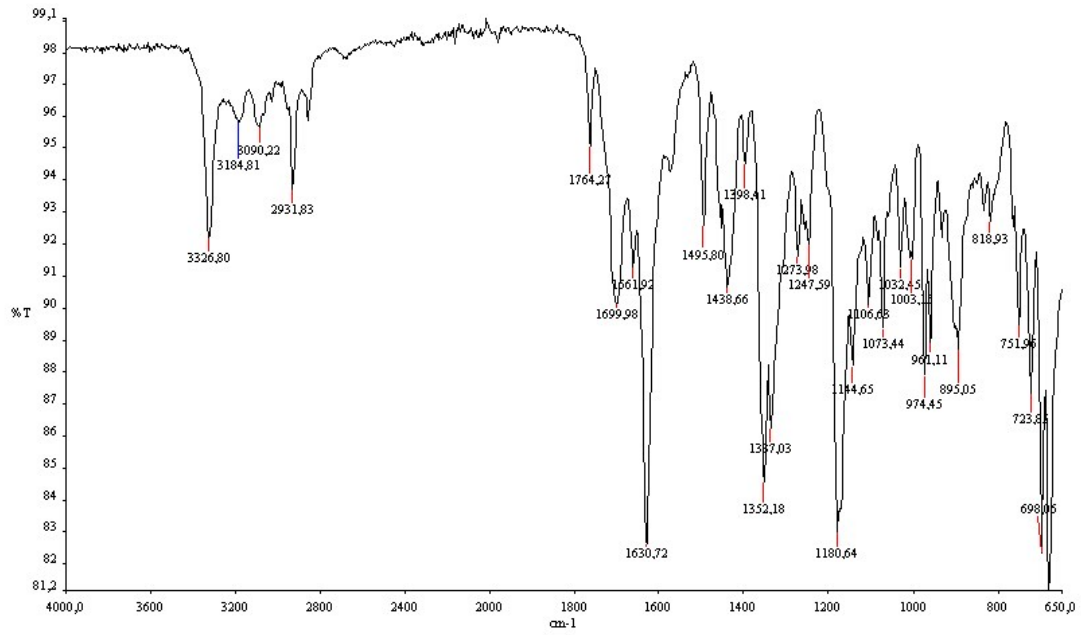

6a

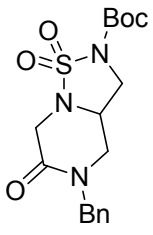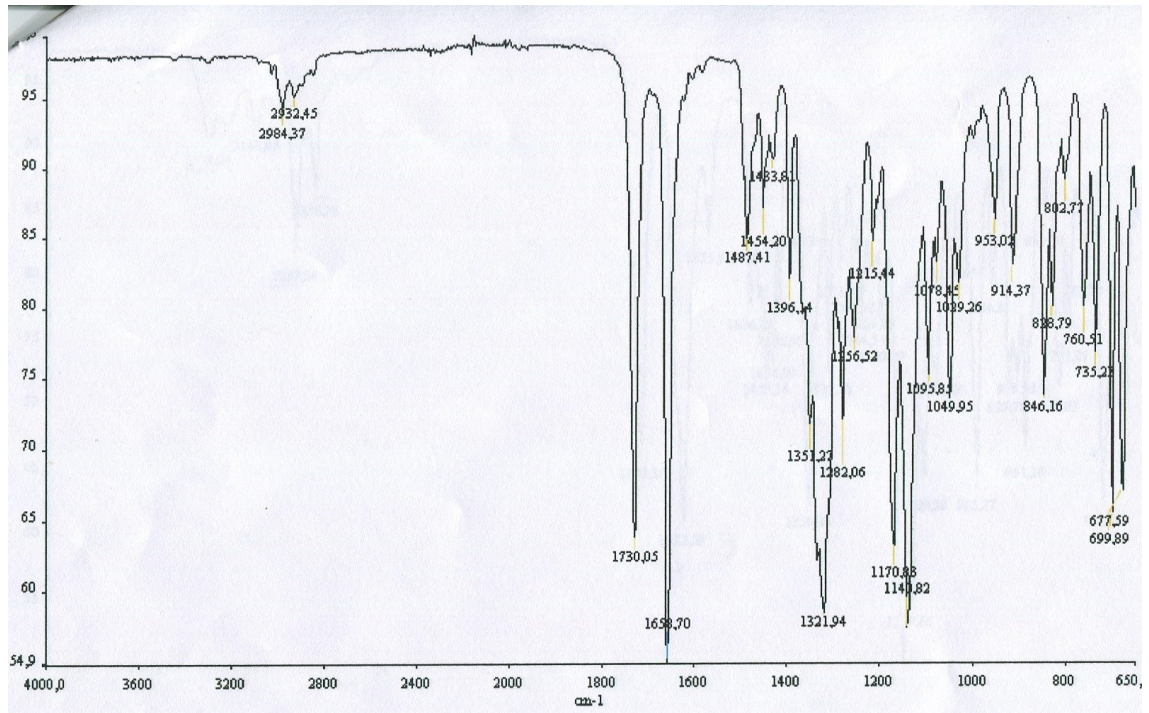



8a

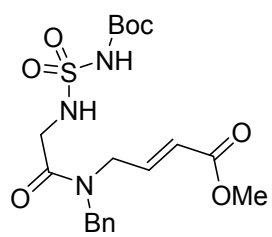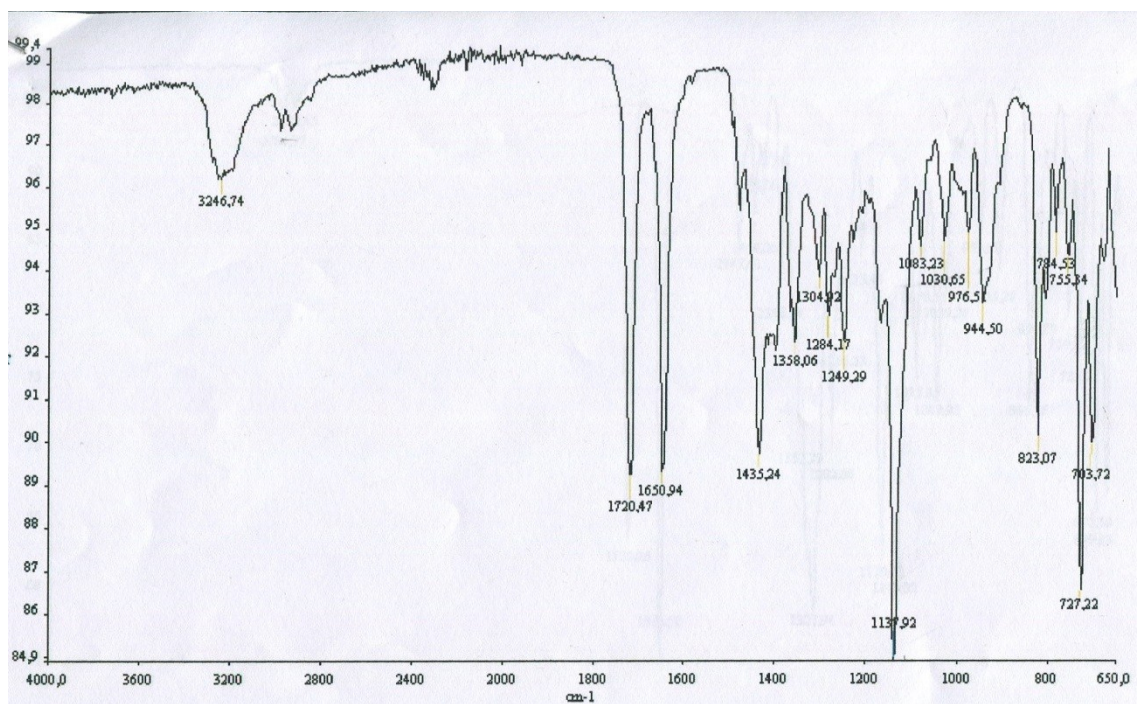

**10a**

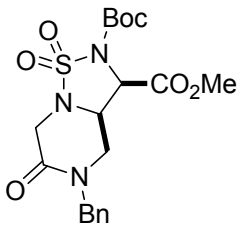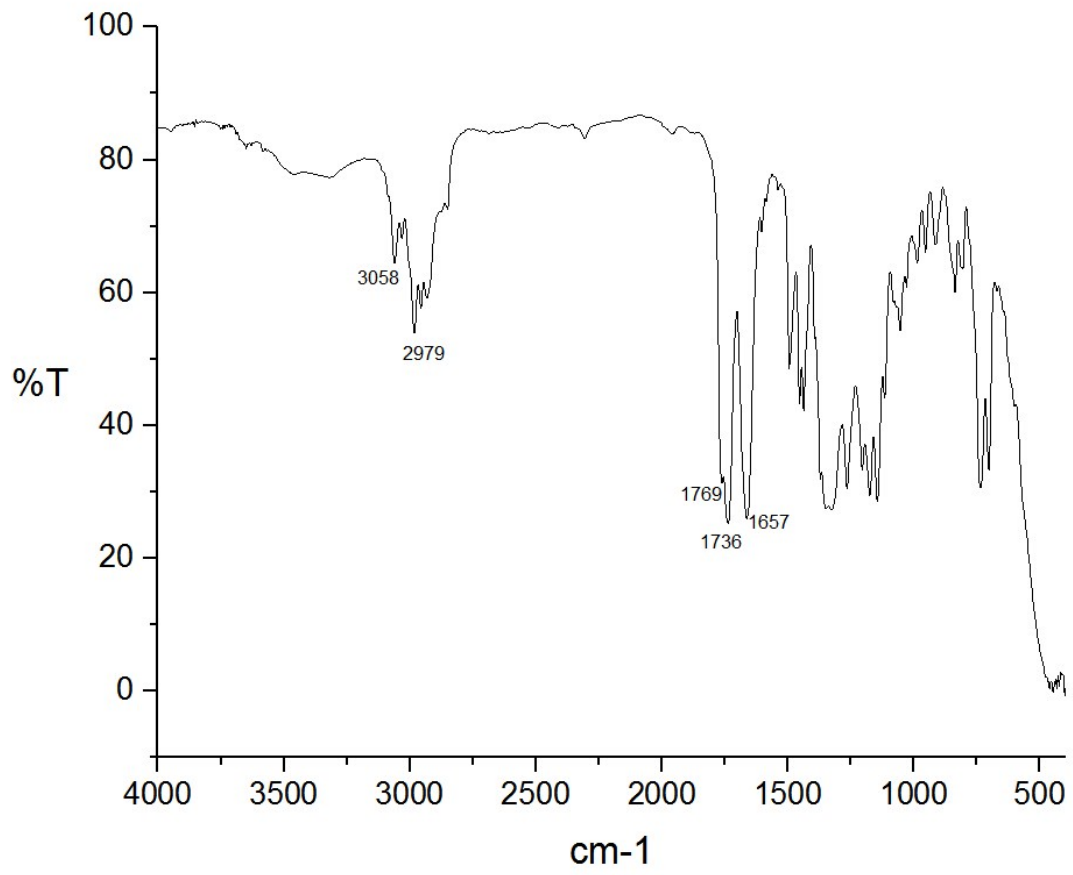



10b

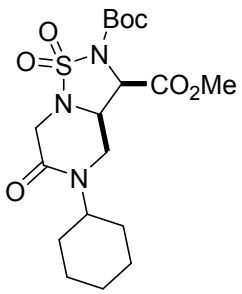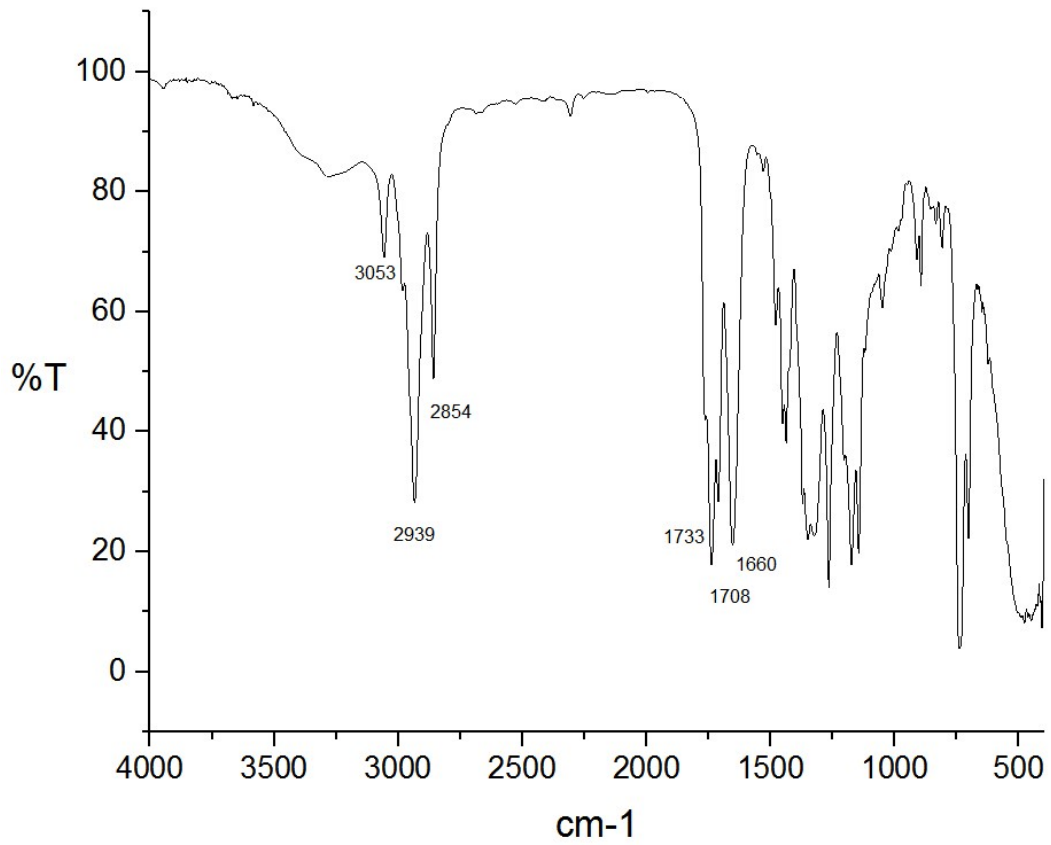

10c

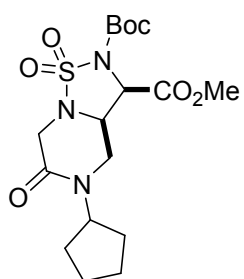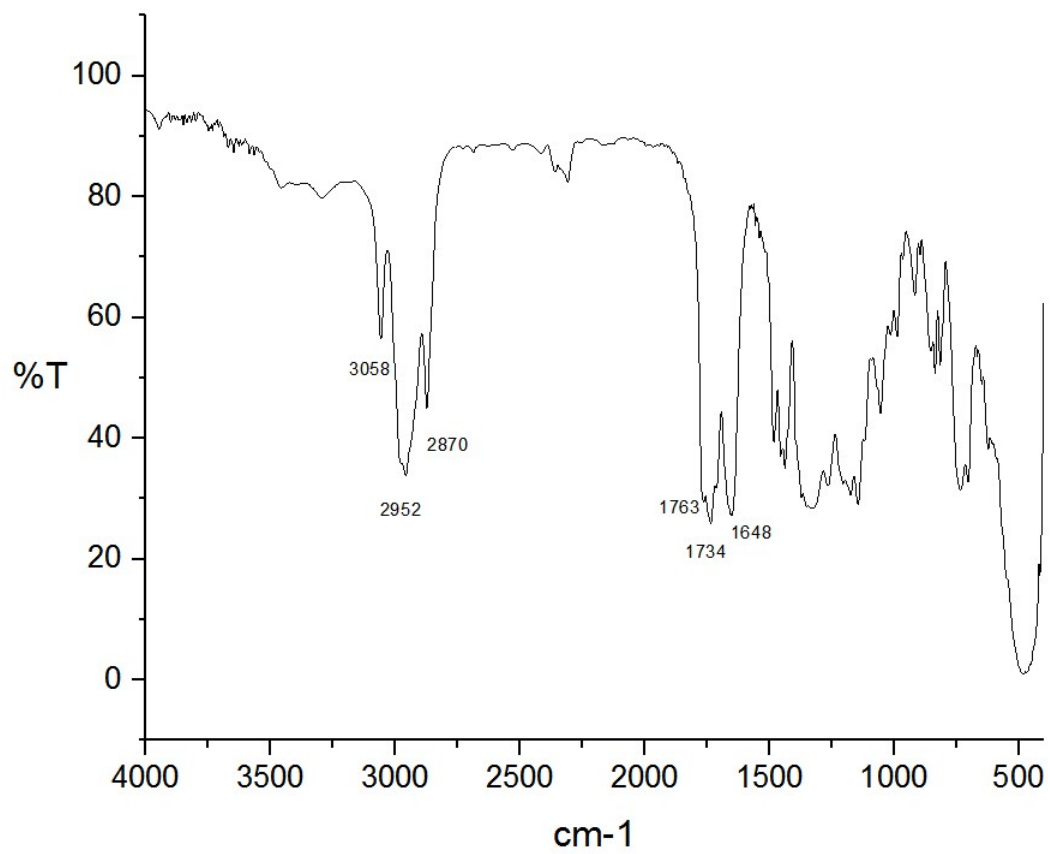

# 11a

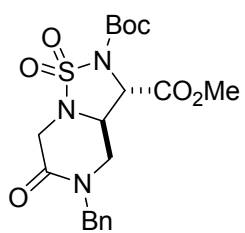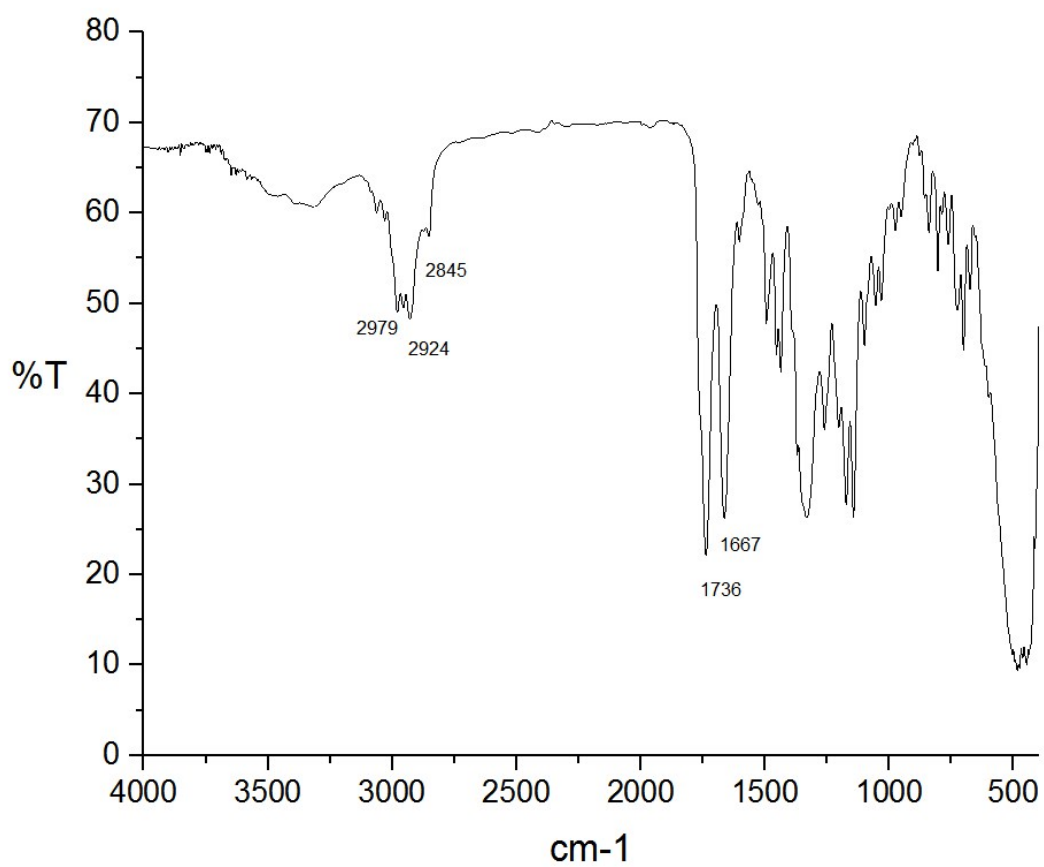

# 11b

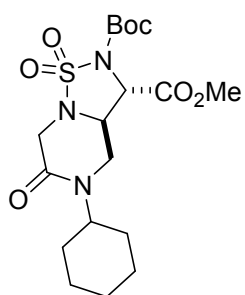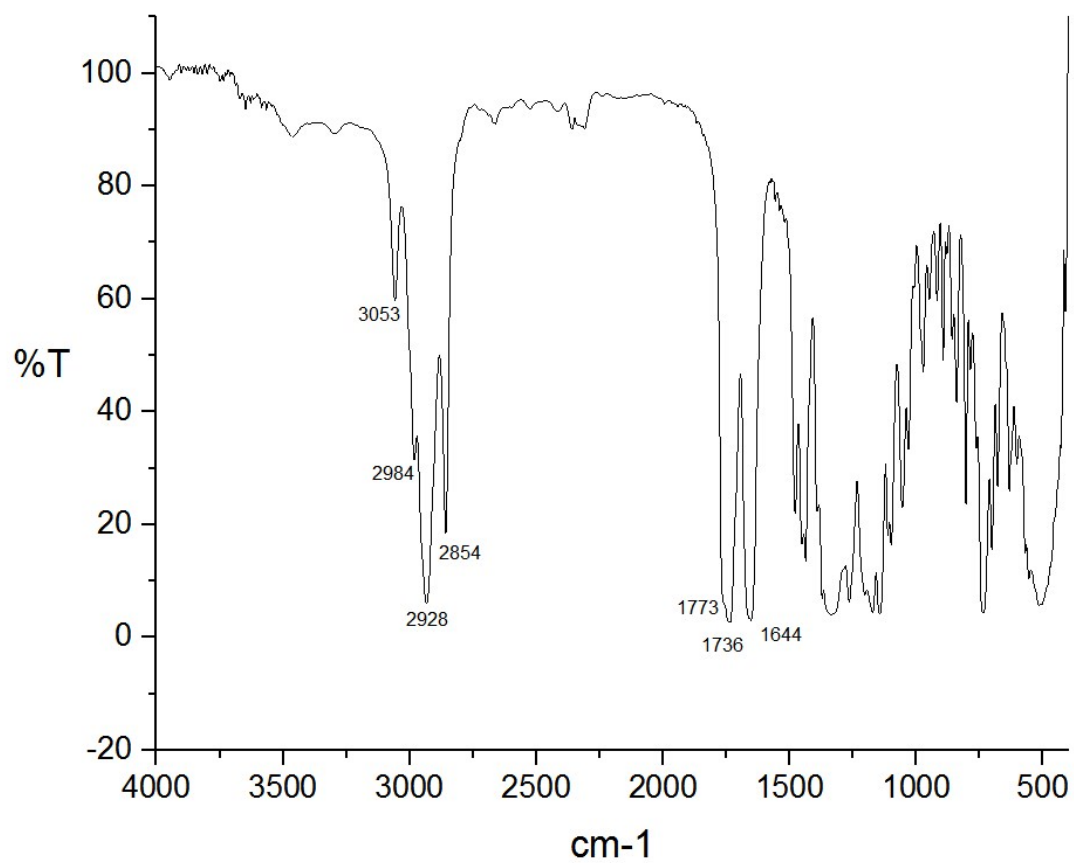

# 11c

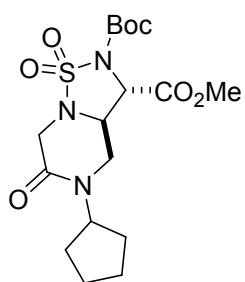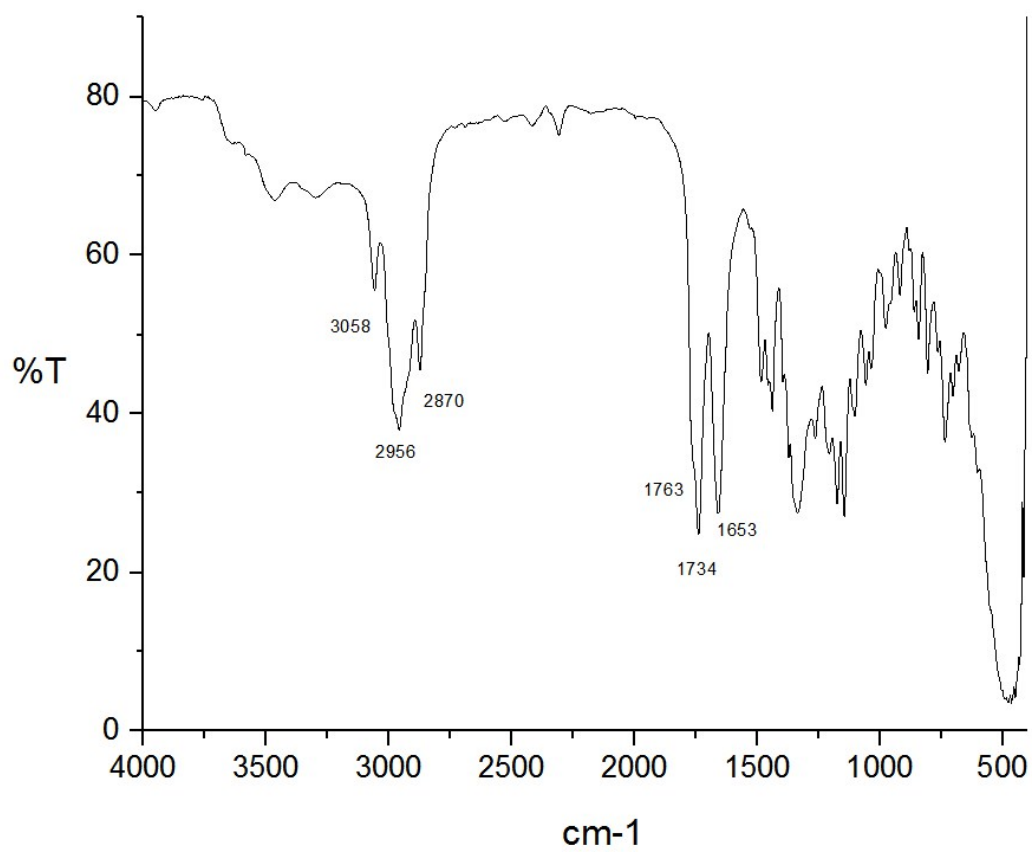

Supplement: c6ra13141g1.pdf [file c6ra13141g1.pdf]
